# Supplementary material
Source: publisher figshare collection journal article supplement (https://wiley.figshare.com/articles/dataset/_/3521531)
Supplement: Supplementary file 1 [file 1]

**Appendix B.** Relationship between photosynthetic capacity and other variables, including statistics.

1. *The relationship between  $V_{c,max25}$  and various variables.*

Predicting photosynthetic capacity ( $V_{c,max25}$ ) for the first combination of plant functional types (PFT1), that consisted the growth form (herbaceous (H), shrubs (S) and trees (Tr)), environmental variables (day length, (D), relative humidity, (RH), temperature (T) and radiation (R)) and leaf nitrogen content ( $LNC_a$ ). The general form of the linear-mixed effects model is described below, where the expected value of  $V_{c,max25}$  is denoted by  $\hat{V}$ ,  $a$  is the intercept and  $b_i$ 's are the coefficients.

$$\hat{V}(PFT1) = a + b_0H + b_1S + b_2Tr + b_3D + b_4RH + b_5T + b_6R + b_7LNC_a \quad (B.1)$$

The values of intercept and coefficients for different temperature response functions are described in Table A6.

2. *The relationship between  $J_{max25}$  and various variables.*

The relationship between  $J_{max25}$  and various determinants; here a subset of the original data was utilized because only 50 studies reported  $J_{max}$  values. The general form of the linear-mixed effects model is described below, where the expected value of  $J_{max25}$  is denoted by  $\hat{J}$ ,  $a$  is the intercept and  $b_i$ 's are the coefficients.

$$\hat{J}(PFT1) = a + b_0H + b_1S + b_2Tr + b_3D + b_4RH + b_5T + b_6R + b_7LNC_a \quad (B.2)$$

The values of intercept and coefficients for different temperature response functions are described in Table A7.

3. *Calculation of  $r^2$  for the linear mixed effects model of  $V_{c,max25}$*

The coefficient of determination,  $r^2$ , is a ratio of explained variation to the total variance

in  $V_{c,max25}$ . In the linear mixed model, the fitted  $V_{c,max25}$  values was obtained for the population predictions (based only on the fixed effects estimates). Specifically, we used the following equation:

$$r^2 = 1 - \frac{\sum_{i=1}^n (V - \bar{V})^2}{\sum_{i=1}^n (V - \bar{V})^2} \quad (\text{B.3})$$

where  $\bar{V}$  is the mean of the observed  $V_{c,max25}$ . The  $r^2$  for the linear mixed effects model of  $J_{max25}$  was calculated in a similar fashion.
